# Supplementary material for: Estimated Long-Term Benefits of Finerenone in Heart Failure: A Prespecified Secondary Analysis of the FINEARTS-HF Randomized Clinical Trial
Source: PubMed Central journal article supplement — JAMA Cardiol. 2024 Sep 27;10(2):176–81. doi: 10.1001/jamacardio.2024.3782 (PMC11581494; doi:10.1001/jamacardio.2024.3782), 2024-09-27
Supplement: jamacardiol-e243782-s004.pdf [file jamacardiol-e243782-s004.pdf]

## Data Sharing Statement

Vaduganathan. Estimated Long-Term Benefits of Finerenone in Heart Failure. *JAMA Cardiol.* Published September 27, 2024. doi:10.1001/jamacardio.2024.3782

### Data

**Additional Information:** FINEARTS-HF (Finerenone Trial to Investigate the Efficacy and Safety Superior to Placebo in Patients with Heart Failure; NCT04435626)

**Data available:** Yes

**Data types:** Other (please specify)

**Additional Information:** Data will be made available to qualified scientific and medical researchers through vivli.org. All requests will be reviewed by an independent scientific review panel and data provided according to the conditions laid out on

<https://vivli.org/ourmember/bayer/>

**How to access data:** <https://vivli.org/ourmember/bayer/>

**When available:** With publication

### Supporting Documents

**Document types:** Statistical/analytic code

**How to access documents:** Statistical Analysis Plan and Protocol included with the submission

**When available:** With publication

### Additional Information

**Who can access the data:** Qualified scientific and medical researchers whose proposed use of the data has been approved

**Types of analyses:** Analyses approved by an independent scientific review panel

**Mechanisms of data availability:** Signed data use agreement
